# Supplementary material for: A comparative kinetic study of modified Pt(dppf)Cl2 complexes and their interactions with l-cys and l-met
Source: Royal Society of Chemistry journal article supplement (doi:10.1039/b504129e), 2005-01-01
Supplement: b504129e.pdf [file b504129e.pdf]

## Supplementary Information to:

### A comparative kinetic study of modified Pt(dppf)Cl<sub>2</sub> complexes and their interactions with *L*-cysteine and *L*-methionine

Graeme Puxty,<sup>a</sup> Haris Bjelosevic,<sup>b</sup> Tina Persson,<sup>b</sup> and Sofi K. C. Elmroth<sup>a\*</sup>

<sup>a</sup> Inorganic Chemistry, Chemical Center, Lund University, P.O. Box 124, SE-221 00 Lund, Sweden.

E-mail: [sofi.elmroth@inorg.lu.se](mailto:sofi.elmroth@inorg.lu.se), Fax: + 46 (0)46 222 4439, Tel: + 46 (0)46 222 8106

<sup>b</sup> Organic Chemistry 1, Chemical Center, Lund University, P.O. Box 124, SE-221 00 Lund, Sweden.

#### Pseudo-first-order rate constants versus concentrations for complexes (I) – (III) with *L*-met:

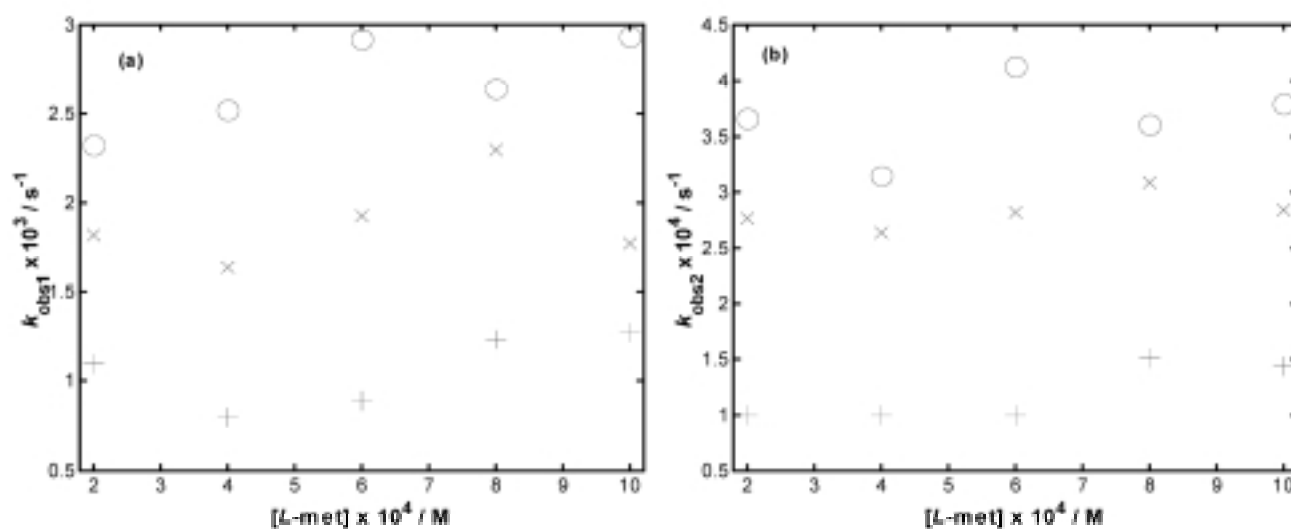

**Figure 1** Plots of pseudo-first-order rate constants versus *L*-met concentration for: (a) formation of the mono adduct and (b) formation of the bis adduct for complex (I) - +, (II) - x and (III) - O.

#### Pseudo-first-order rate constants versus concentrations for cisplatin with *L*-cys and *L*-met:

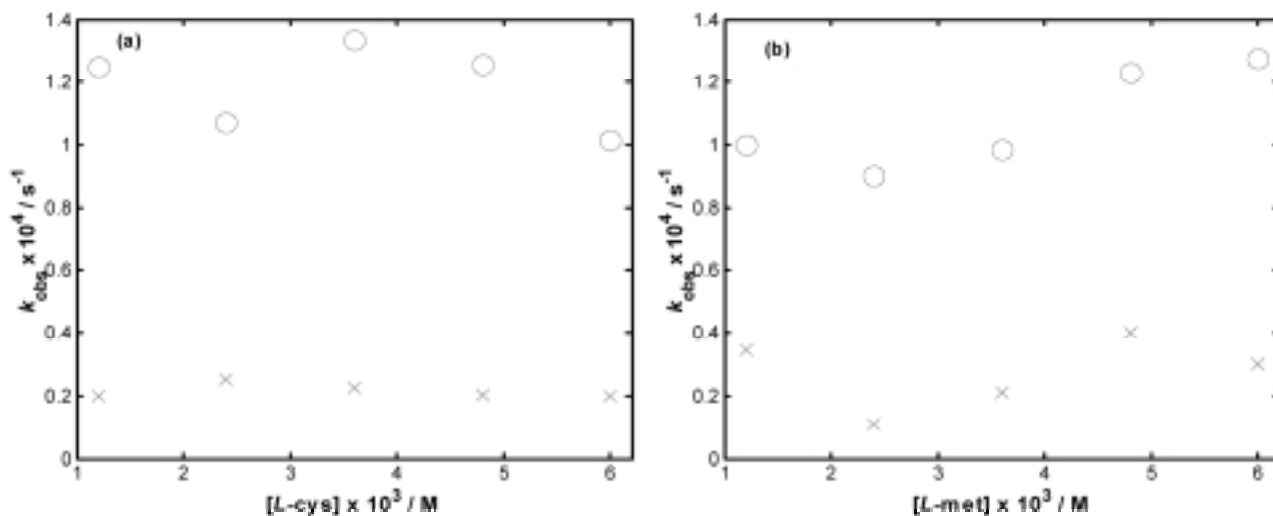

**Figure 2** Plots of pseudo-first-order rate constants for formation of the mono (O) and bis (x) adducts for cisplatin versus: (a) concentration of *L*-cys and (b) concentrations of *L*-met.



Measured and calculated absorbance data at 239 nm for complexes (I), (II) and cisplatin with *L*-cys:

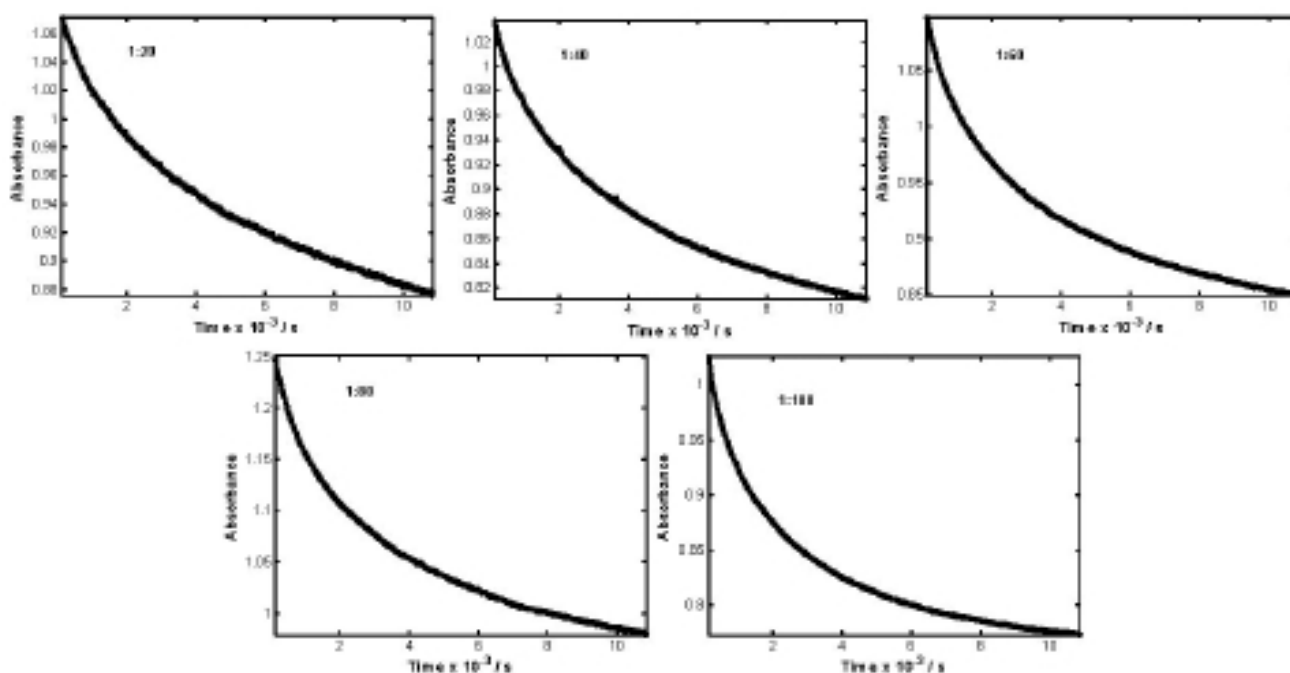

**Figure 3** Plots of measured (•••) and calculated (—) absorbance data at 239 nm for the reaction between complex (I) and *L*-cys with Pt(II):*L*-cys ratios of 1:20 to 1:100.

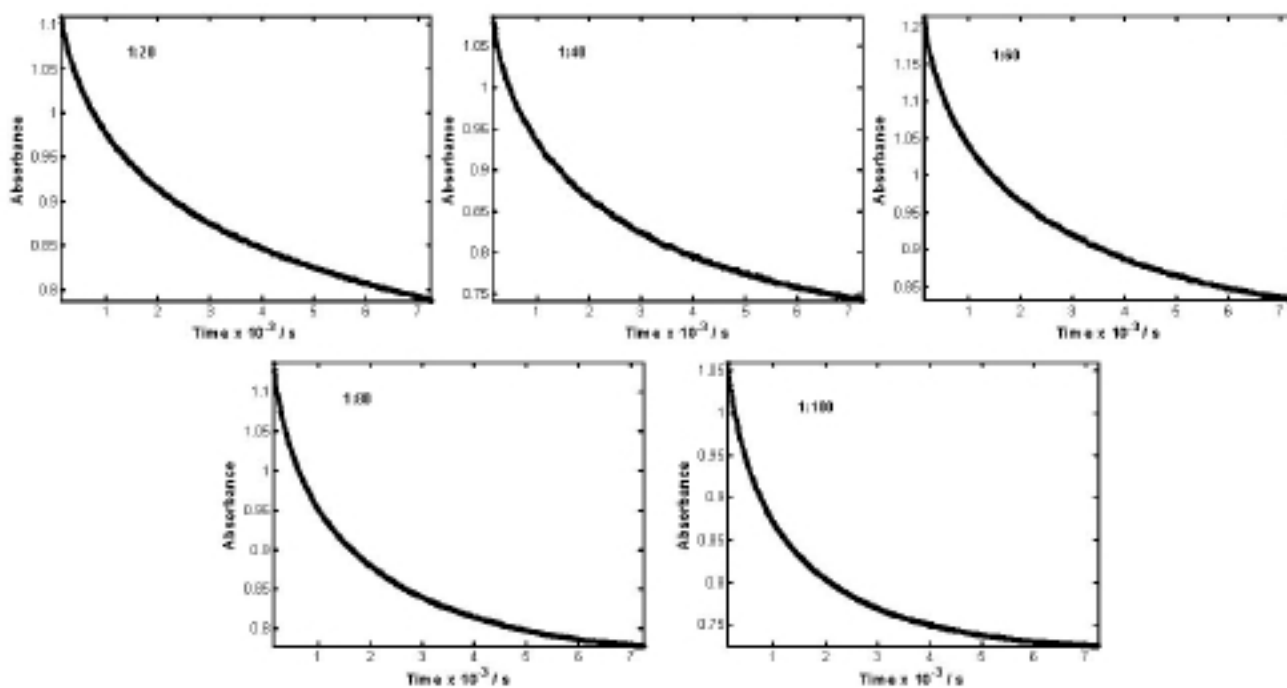

**Figure 4** Plots of measured (•••) and calculated (—) absorbance data at 239 nm for the reaction between complex (II) and *L*-cys with Pt(II):*L*-cys ratios of 1:20 to 1:100.

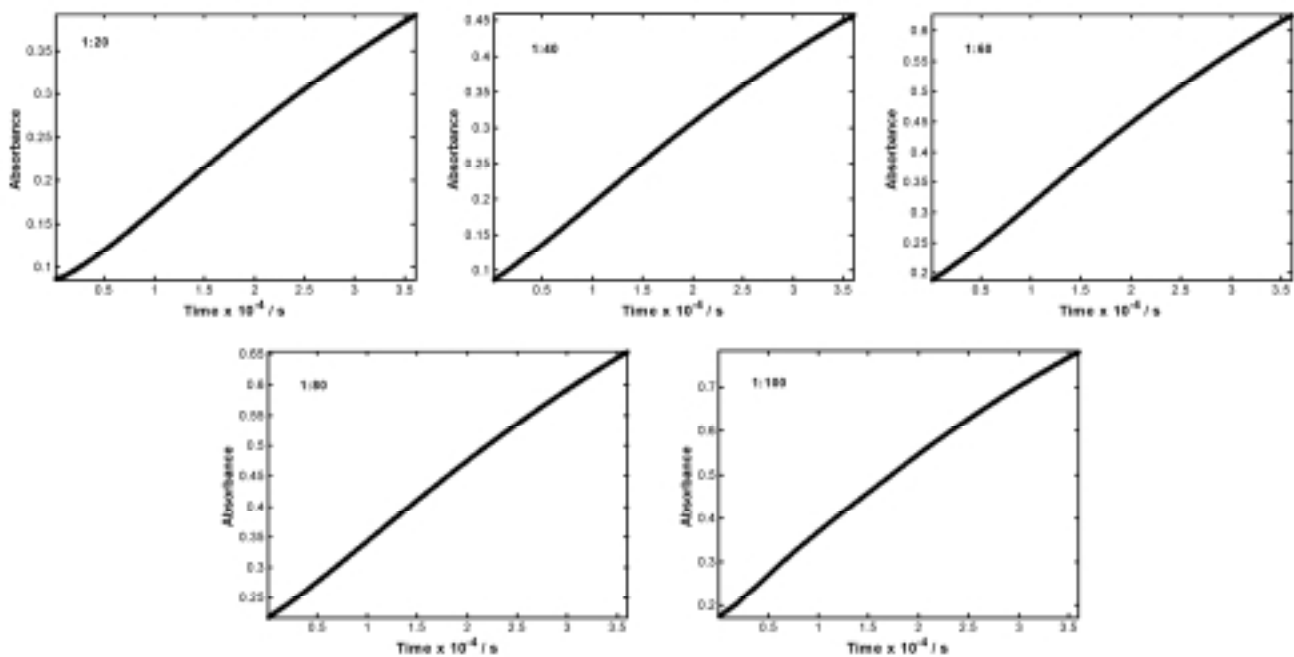

**Figure 5** Plots of measured (•••) and calculated (—) absorbance data at 239 nm for the reaction between cisplatin and *L*-cys with Pt(II):*L*-cys ratios of 1:20 to 1:100.

**Measured and calculated absorbance data at 239 nm for complexes (I) – (III) and cisplatin with *L*-met:**

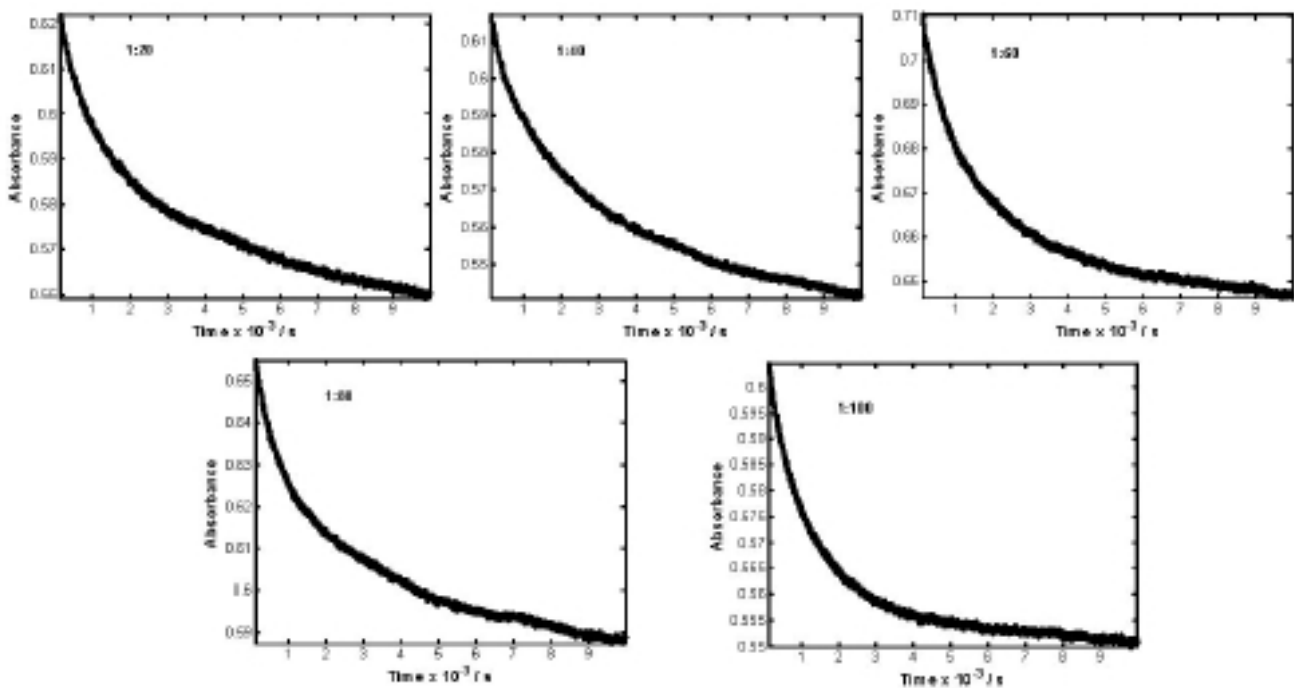

**Figure 6** Plots of measured (•••) and calculated (—) absorbance data at 239 nm for the reaction between complex (I) and *L*-met with Pt(II):*L*-cys ratios of 1:20 to 1:100.

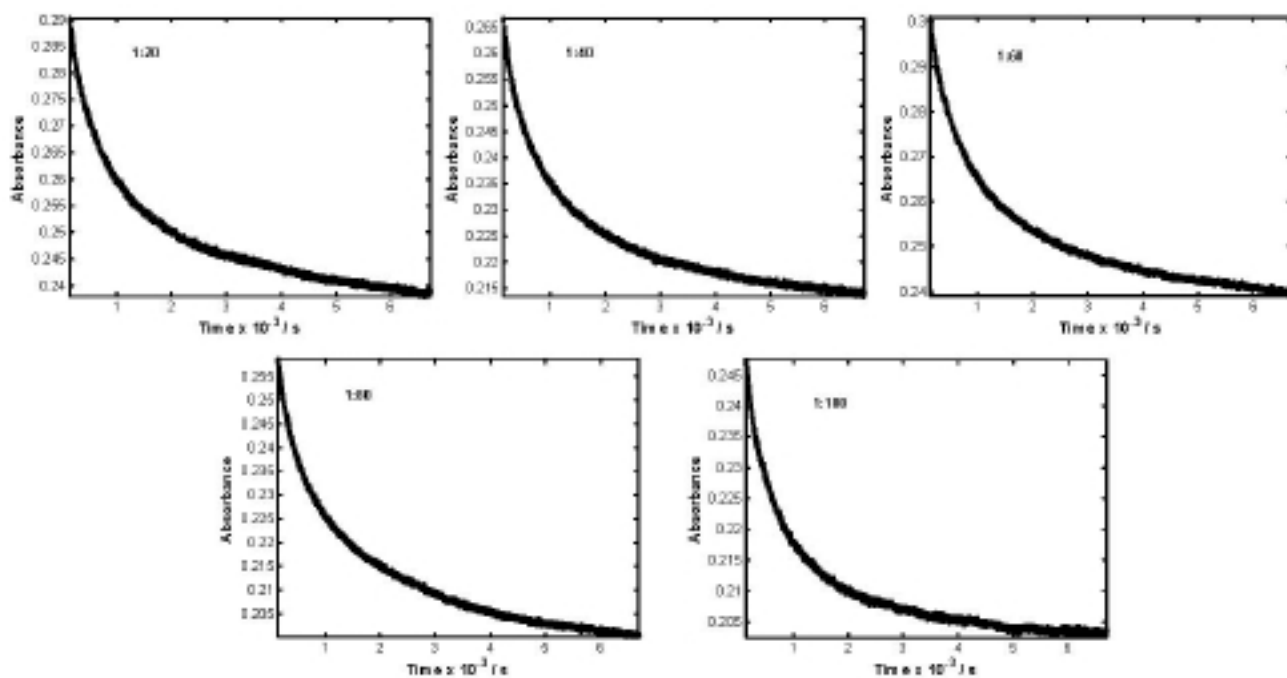

**Figure 7** Plots of measured (•••) and calculated (—) absorbance data at 239 nm for the reaction between complex (II) and *L*-met with Pt(II):*L*-cys ratios of 1:20 to 1:100.

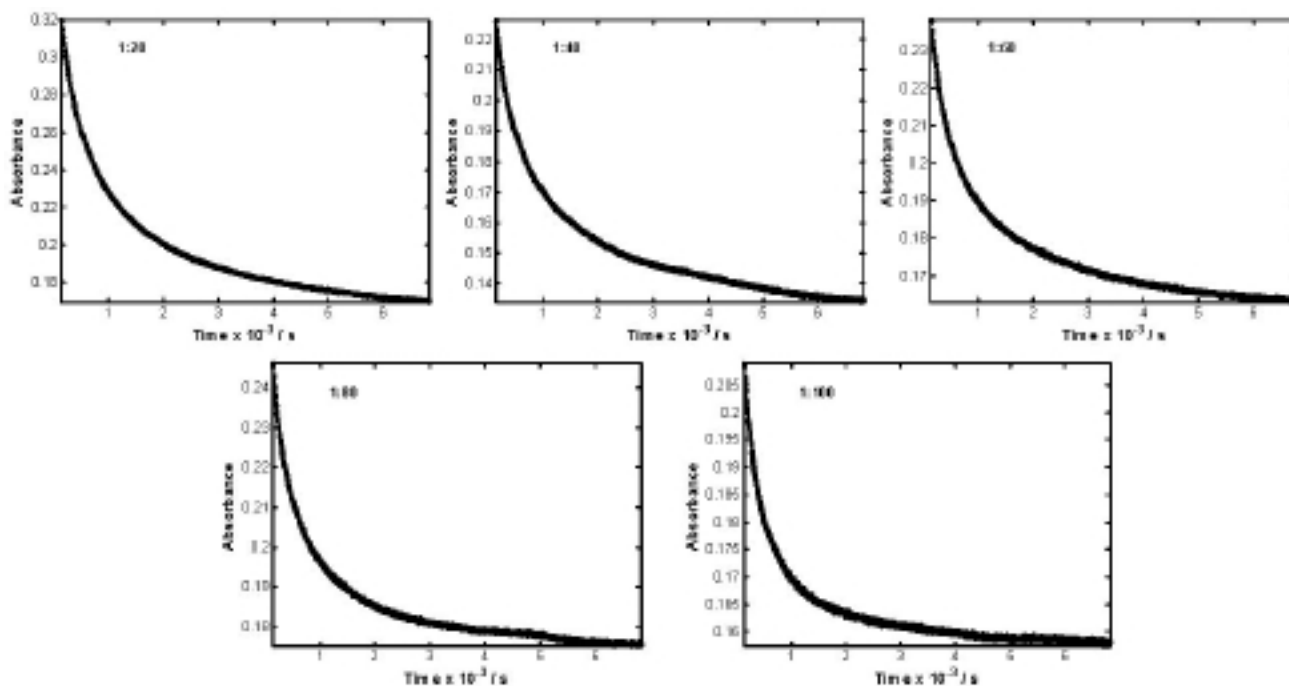

**Figure 8** Plots of measured (•••) and calculated (—) absorbance data at 239 nm for the reaction between complex (III) and *L*-met with Pt(II):*L*-cys ratios of 1:20 to 1:100.

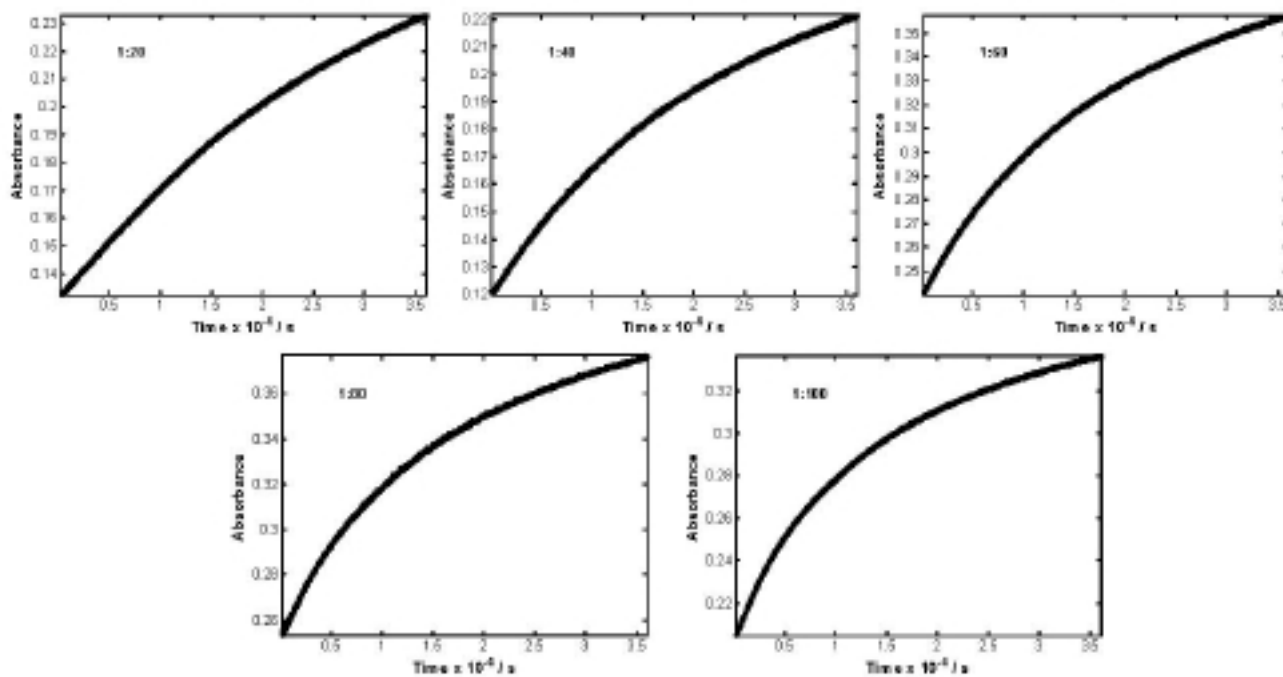

**Figure 9** Plots of measured (•••) and calculated (—) absorbance data at 239 nm for the reaction between cisplatin and *L*-met with Pt(II):*L*-cys ratios of 1:20 to 1:100.

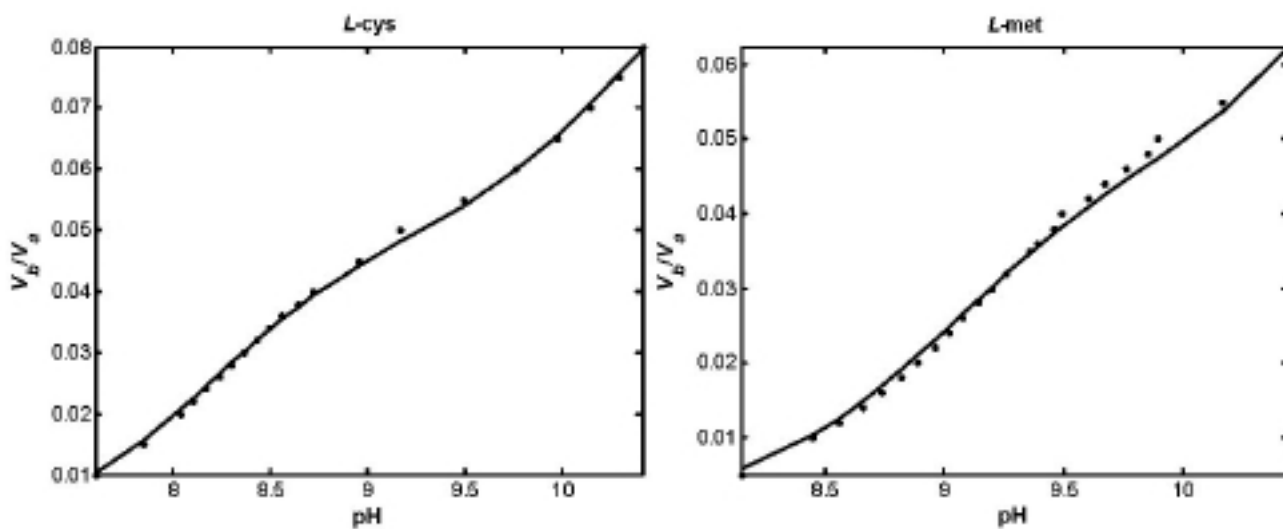

**Figure 10** Plots of measured (•••) and calculated (—) pH titration data for *L*-cys and *L*-met.
